# Supplementary material for: A novel benzoxazine/bismaleimide blend resulting in bi-continuous phase separated morphology
Source: Royal Society of Chemistry journal article supplement (doi:10.1039/c2ra22508e), 2012-11-26
Supplement: c2ra22508e.pdf [file c2ra22508e.pdf]

## Supporting Information

for RSC Advances

### A Novel Benzoxazine / Bismaleimide Blend Resulting in the Bi-continuous Phase Separated Morphology

Zhi Wang, Qichao Ran, Rongqi Zhu, Yi Gu \*

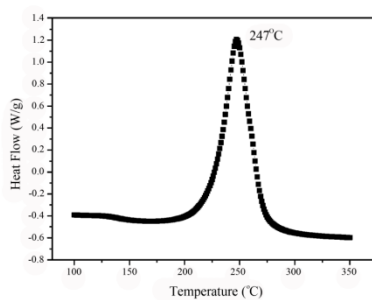

Figure S1. DSC curve of BT11
